# Supplementary material
Source: PubMed Central journal article supplement (PMC3459006)
Supplement: Supp_Fig1.pdf [file Supp_Fig1.pdf]

## CGM Detection of Hypoglycemia

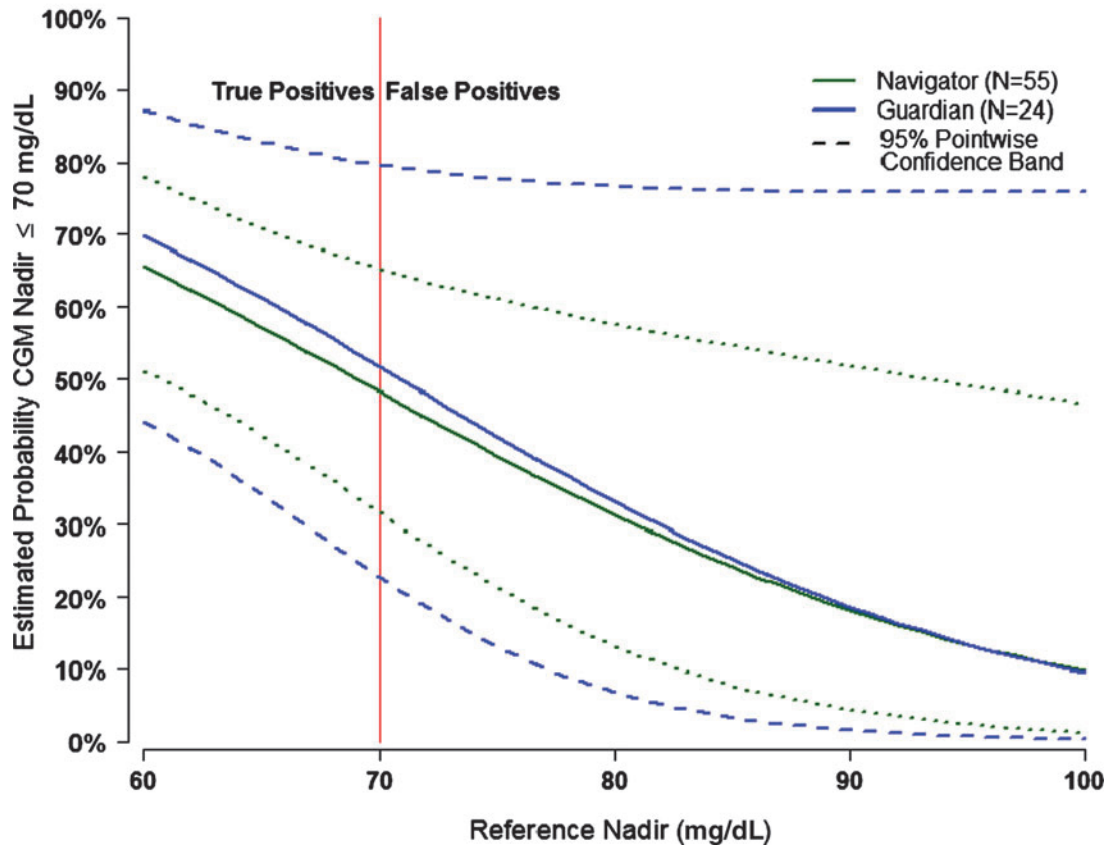

SUPPLEMENTARY FIG. S1. Logistic regression was used to estimate the probability the continuous glucose monitoring (CGM) detects hypoglycemia (single value  $\leq 70$  mg/dL) as a function of the reference blood glucose nadir.
