# Supplementary material
Source: PubMed Central journal article supplement (PMC3459006)
Supplement: Supp_Table1.pdf [file Supp_Table1.pdf]

SUPPLEMENTARY TABLE S1. STUDIES PROVIDING DATA FOR THE ANALYSES

| Study           | Device type | Number of subjects <sup>a</sup> | Admission               |            | Reference frequency <sup>b</sup> | CGM frequency | Included exercise session | Age range (years) | M/F   |
|-----------------|-------------|---------------------------------|-------------------------|------------|----------------------------------|---------------|---------------------------|-------------------|-------|
|                 |             |                                 | Start                   | End        |                                  |               |                           |                   |       |
| 1 <sup>7</sup>  | Navigator   | 29                              | 11:00 a.m. <sup>c</sup> | 11:00 a.m. | 30 min                           | 10 min        | Yes                       | (5, 18)           | 17/12 |
| 2 <sup>8</sup>  | Navigator   | 12                              | 6:30 p.m.               | 12:00 p.m. | 15 min                           | 1 min         | No                        | (23, 50)          | 5/7   |
| 3 <sup>8</sup>  | Navigator   | 11                              | 7:30 p.m.               | 12:00 p.m. | 15 min                           | 1 min         | No                        | (19, 57)          | 4/7   |
| 4 <sup>9</sup>  | Guardian    | 12                              | 5:00 p.m.               | 12:00 p.m. | 15 min                           | 1 min         | No                        | (5, 18)           | 7/5   |
| 5 <sup>9</sup>  | Navigator   | 9                               | 4:00 p.m.               | 8:00 a.m.  | 15 min                           | 1 min         | Yes                       | (12, 17)          | 3/6   |
| 6 <sup>10</sup> | Guardian    | 24                              | 4:00 p.m.               | 7:00 a.m.  | 30 min                           | 5 min         | No                        | (5, 18)           | 15/9  |

<sup>a</sup>Four subjects in Study 4 were also in Study 5.

<sup>b</sup>Study 1 had reference measurements taken every 10 min for 1 h following breakfast. Study 6 had reference measurements taken every 15 min for 2 h following dinner.

<sup>c</sup>Inpatient Clinical Research Center admission lasted approximately 24h, but initial start time varied, typically starting at 11 a.m.

CGM, continuous glucose monitoring; F, female; M, male.

<sup>7-10</sup>Reference number corresponding to study.
