# Supplementary material
Source: PubMed Central journal article supplement (PMC3459006)
Supplement: Supp_Table2.pdf [file Supp_Table2.pdf]

SUPPLEMENTARY TABLE S2. CONTINUOUS GLUCOSE MONITORING POINT ACCURACY  
ACCORDING TO REFERENCE GLUCOSE LEVELS

|                           | n     | Median difference (mg/dL) | Median AD (mg/dL) | Median RAD | % ISO |
|---------------------------|-------|---------------------------|-------------------|------------|-------|
| Overall                   |       |                           |                   |            |       |
| Total                     | 5,206 | 0                         | 16                | 12%        | 75%   |
| Reference glucose (mg/dL) |       |                           |                   |            |       |
| ≤60                       | 214   | 5                         | 8                 | 14%        | 75%   |
| ≤70                       | 479   | 5                         | 9                 | 14%        | 73%   |
| 71–120                    | 1,568 | 5                         | 14                | 15%        | 65%   |
| 121–180                   | 1,563 | –1                        | 16                | 11%        | 77%   |
| >180                      | 1,596 | –11                       | 22                | 9%         | 85%   |
| Daytime                   |       |                           |                   |            |       |
| Total                     | 2,950 | 0                         | 18                | 12%        | 73%   |
| Reference glucose (mg/dL) |       |                           |                   |            |       |
| ≤60                       | 93    | 4                         | 9                 | 15%        | 65%   |
| ≤70                       | 215   | 8                         | 10                | 16%        | 63%   |
| 71–120                    | 795   | 7                         | 15                | 16%        | 61%   |
| 121–180                   | 869   | 1                         | 17                | 12%        | 77%   |
| >180                      | 1,071 | –12                       | 24                | 10%        | 82%   |
| Nighttime                 |       |                           |                   |            |       |
| Total                     | 2,256 | –1                        | 14                | 11%        | 78%   |
| Reference glucose (mg/dL) |       |                           |                   |            |       |
| ≤60                       | 121   | 6                         | 7                 | 13%        | 83%   |
| ≤70                       | 264   | 3                         | 8                 | 13%        | 81%   |
| 71–120                    | 773   | 3                         | 13                | 14%        | 70%   |
| 121–180                   | 694   | –3                        | 16                | 11%        | 77%   |
| >180                      | 525   | –10                       | 19                | 8%         | 90%   |

AD, absolute difference (|continuous glucose monitoring value – reference value|); ISO, International Organization for Standardization criteria (continuous glucose monitoring measurements within  $\pm 15$  mg/dL for reference glucose values  $\leq 75$  mg/dL and within  $\pm 20\%$  for reference values  $> 75$  mg/dL); RAD, relative absolute difference (AD/reference value).
