# Supplementary material
Source: PubMed Central journal article supplement (PMC3459006)
Supplement: Supp_Table3.pdf [file Supp_Table3.pdf]

SUPPLEMENTARY TABLE S3. COMPARISON OF CONTINUOUS GLUCOSE MONITORING AND REFERENCE GLUCOSE MEASUREMENTS COMPUTED OVER EACH HOSPITAL NIGHT AND DAY

|                                                   | <i>Median (25<sup>th</sup>, 75<sup>th</sup> percentile)</i> |                     |                               | <i>Absolute value of the difference</i> | <i>r<sup>b</sup></i> | <i>P value</i> |
|---------------------------------------------------|-------------------------------------------------------------|---------------------|-------------------------------|-----------------------------------------|----------------------|----------------|
|                                                   | <i>Reference</i>                                            | <i>CGM</i>          | <i>Difference<sup>a</sup></i> |                                         |                      |                |
| <b>Daytime (n=81)</b>                             |                                                             |                     |                               |                                         |                      |                |
| Mean glucose (mg/dL)                              | 154 (132, 190)                                              | 155 (137, 182)      | -4 (-14, 16)                  | 14 (7, 21)                              | 0.84                 | 0.99           |
| Percentage of values between 71 and 180 mg/dL (%) | 60 (41, 75)                                                 | 58 (43, 79)         | 1 (-6, 11)                    | 9 (5, 14)                               | 0.80                 | 0.22           |
| Percentage of values ≤ 70 mg/dL (%)               | 4 (0, 10)                                                   | 0 (0, 9)            | 0 (-5, 0)                     | 3 (0, 7)                                | 0.47                 | 0.02           |
| Nadir glucose (mg/dL)                             | 65 (57, 82)                                                 | 75 (59, 95)         | 6 (-7, 17)                    | 13 (6, 21)                              | 0.60                 | 0.02           |
| Area under the curve 70 mg/dL                     | 0.12 (0.00, 0.69)                                           | 0.00 (0.00, 0.33)   | 0.00 (-0.33, 0.12)            | 0.18 (0.00, 0.77)                       | 0.41                 | 0.61           |
| Low Blood Glucose Index                           | 0.9 (0.4, 1.9)                                              | 0.4 (0.1, 1.7)      | -0.1 (-0.7, 0.1)              | 0.6 (0.1, 1.2)                          | 0.71                 | 0.04           |
| Percentage of values > 180 mg/dL (%)              | 30 (17, 53)                                                 | 33 (12, 55)         | 0 (-7, 7)                     | 7 (3, 15)                               | 0.84                 | 0.89           |
| Peak glucose (mg/dL)                              | 263 (203, 319)                                              | 257 (202, 307)      | -12 (-38, 10)                 | 24 (12, 46)                             | 0.88                 | 0.005          |
| Area under the curve 180 mg/dL                    | 17.30 (2.82, 30.53)                                         | 12.99 (2.60, 23.10) | -0.88 (-8.74, 2.39)           | 6.62 (2.06, 13.05)                      | 0.85                 | 0.07           |
| High Blood Glucose Index                          | 6.5 (3.5, 12.0)                                             | 6.5 (3.2, 9.7)      | -0.6 (-2.4, 1.7)              | 2.2 (1.0, 3.3)                          | 0.85                 | 0.16           |
| Glucose CV (%)                                    | 35 (26, 42)                                                 | 31 (25, 37)         | -3 (-9, 0)                    | 4 (1, 10)                               | 0.84                 | <0.001         |
| <b>Nighttime (n=94)</b>                           |                                                             |                     |                               |                                         |                      |                |
| Mean glucose (mg/dL)                              | 141 (116, 168)                                              | 135 (103, 171)      | -6 (-19, 7)                   | 13 (6, 25)                              | 0.90                 | 0.01           |
| Percentage of values between 71 and 180 mg/dL (%) | 71 (45, 88)                                                 | 73 (39, 92)         | 0 (-8, 8)                     | 8 (2, 19)                               | 0.83                 | 0.89           |
| Percentage of values ≤ 70 mg/dL (%)               | 0 (0, 8)                                                    | 0 (0, 11)           | 0 (0, 4)                      | 0 (0, 8)                                | 0.63                 | 0.05           |
| Nadir glucose (mg/dl)                             | 83 (61, 114)                                                | 83 (59, 118)        | -1 (-11, 14)                  | 13 (6, 22)                              | 0.79                 | 0.67           |
| Area under the curve 70 mg/dL                     | 0.00 (0.00, 0.50)                                           | 0.00 (0.00, 0.49)   | 0.00 (0.00, 0.02)             | 0.00 (0.00, 0.73)                       | 0.61                 | 0.16           |
| Low Blood Glucose Index                           | 0.4 (0.0, 2.2)                                              | 0.4 (0.0, 2.4)      | 0.0 (-0.3, 0.9)               | 0.5 (0.0, 1.8)                          | 0.84                 | 0.42           |
| Percentage of values > 180 mg/dL (%)              | 21 (0, 38)                                                  | 10 (0, 38)          | 0 (-8, 0)                     | 3 (0, 13)                               | 0.90                 | 0.07           |
| Peak glucose (mg/dL)                              | 203 (158, 236)                                              | 196 (155, 246)      | -7 (-27, 13)                  | 18 (8, 35)                              | 0.90                 | 0.01           |
| Area under the curve 180 mg/dL                    | 2.68 (0.00, 14.08)                                          | 0.72 (0.00, 11.42)  | 0.00 (-3.83, 0.00)            | 1.44 (0.00, 7.91)                       | 0.89                 | 0.006          |
| High Blood Glucose Index                          | 4.2 (1.1, 6.6)                                              | 3.2 (0.6, 6.8)      | -0.3 (-2.0, 0.0)              | 1.1 (0.3, 2.6)                          | 0.91                 | 0.001          |
| Glucose CV (%)                                    | 24 (16, 32)                                                 | 20 (14, 31)         | -3 (-6, 1)                    | 5 (2, 7)                                | 0.87                 | <0.001         |

<sup>a</sup>Continuous glucose monitoring (CGM) – reference.

<sup>b</sup>Spearman correlation

CV, coefficient of variation (SD/mean).
