# Supplementary material
Source: PubMed Central journal article supplement (PMC3459006)
Supplement: Supp_Table4.pdf [file Supp_Table4.pdf]

SUPPLEMENTARY TABLE S4. COMPARISON OF CONTINUOUS GLUCOSE MONITORING AND REFERENCE  
GLUCOSE MEASUREMENTS COMPUTED FOR EACH DEVICE

|                                                      | <i>Navigator (n=55)</i> |                    |                                             |                | <i>Guardian (n=24)</i> |                     |                                             |                |
|------------------------------------------------------|-------------------------|--------------------|---------------------------------------------|----------------|------------------------|---------------------|---------------------------------------------|----------------|
|                                                      | <i>Reference</i>        | <i>CGM</i>         | <i>Absolute value<br/>of the difference</i> | <i>P value</i> | <i>Reference</i>       | <i>CGM</i>          | <i>Absolute value<br/>of the difference</i> | <i>P value</i> |
| Mean glucose (mg/dL)                                 | 147 (124, 174)          | 146 (127, 168)     | 16 (8, 20)                                  | 0.64           | 141 (126, 194)         | 155 (121, 186)      | 11 (5, 20)                                  | 0.60           |
| Percentage of values between 71<br>and 180 mg/dL (%) | 68 (47, 78)             | 66 (51, 84)        | 7 (3, 14)                                   | 0.44           | 61 (37, 78)            | 51 (34, 79)         | 7 (5, 10)                                   | 0.74           |
| Percentage of values ≤ 70 mg/dL (%)                  | 5 (1, 10)               | 2 (0, 10)          | 3 (1, 6)                                    | 0.41           | 4 (0, 12)              | 2 (0, 9)            | 3 (0, 10)                                   | 0.49           |
| Nadir glucose (mg/dL)                                | 59 (55, 70)             | 64 (49, 79)        | 13 (7, 22)                                  | 0.11           | 59 (53, 94)            | 70 (52, 101)        | 12 (7, 20)                                  | 0.28           |
| Area under the curve 70 mg/dL                        | 0.35 (0.00, 0.72)       | 0.08 (0.00, 0.87)  | 0.22 (0.03, 0.64)                           | 0.89           | 0.23 (0.00, 0.85)      | 0.01 (0.00, 0.65)   | 0.49 (0.00, 0.81)                           | 0.75           |
| Low Blood Glucose Index                              | 1.1 (0.5, 2.1)          | 0.7 (0.2, 2.1)     | 0.6 (0.2, 1.4)                              | 0.24           | 1.0 (0.2, 1.9)         | 0.9 (0.0, 1.7)      | 0.5 (0.0, 1.2)                              | 0.76           |
| Percentage of values > 180 mg/dL (%)                 | 25 (13, 44)             | 24 (11, 45)        | 5 (2, 14)                                   | 0.50           | 23 (8, 63)             | 31 (14, 53)         | 7 (4, 9)                                    | 0.69           |
| Peak glucose (mg/dL)                                 | 263 (205, 335)          | 259 (202, 316)     | 27 (12, 49)                                 | <0.001         | 248 (204, 280)         | 246 (204, 306)      | 26 (8, 40)                                  | 1.00           |
| Area under the curve 180 mg/dL                       | 12.50 (2.34, 22.87)     | 8.66 (1.37, 16.55) | 4.41 (1.51, 12.67)                          | 0.02           | 8.25 (1.48, 23.93)     | 14.27 (2.72, 30.50) | 2.58 (0.80, 12.47)                          | 0.36           |
| High Blood Glucose Index                             | 5.0 (3.0, 9.4)          | 5.0 (2.4, 8.1)     | 1.5 (0.7, 3.6)                              | 0.05           | 4.7 (2.5, 10.9)        | 6.3 (2.8, 11.6)     | 1.6 (0.5, 2.9)                              | 0.56           |
| Glucose CV (%)                                       | 37 (29, 45)             | 31 (26, 40)        | 4 (2, 8)                                    | <0.001         | 30 (24, 38)            | 27 (20, 40)         | 2 (1, 6)                                    | 0.85           |

CGM, continuous glucose monitoring; CV, coefficient of variation (SD/mean).
