# Supplementary material
Source: PubMed Central journal article supplement (PMC3459006)
Supplement: Supp_Table5.pdf [file Supp_Table5.pdf]

SUPPLEMENTARY TABLE S5. PERCENTAGES OF GLUCOSE MEASUREMENTS IN DIFFERENT RANGES FOR EACH STUDY

|                                       | <i>Study</i> |            |            |            |            |            |            |            |            |            |            |            |
|---------------------------------------|--------------|------------|------------|------------|------------|------------|------------|------------|------------|------------|------------|------------|
|                                       | <i>1</i>     |            | <i>2</i>   |            | <i>3</i>   |            | <i>4</i>   |            | <i>5</i>   |            | <i>6</i>   |            |
|                                       | <i>CGM</i>   | <i>Ref</i> | <i>CGM</i> | <i>Ref</i> | <i>CGM</i> | <i>Ref</i> | <i>CGM</i> | <i>Ref</i> | <i>CGM</i> | <i>Ref</i> | <i>CGM</i> | <i>Ref</i> |
| All values ( <i>n</i> )               | 3,899        | 1,475      | 1,2098     | 819        | 1,0875     | 730        | 1,3720     | 914        | 7,694      | 496        | 3,860      | 761        |
| 71–180 mg/dL (%)                      | 63%          | 59%        | 73%        | 72%        | 66%        | 72%        | 46%        | 50%        | 49%        | 51%        | 64%        | 59%        |
| > 180 mg/dL (%)                       | 34%          | 37%        | 15%        | 18%        | 23%        | 18%        | 38%        | 36%        | 33%        | 33%        | 34%        | 38%        |
| > 250 mg/dL (%)                       | 11%          | 16%        | 0%         | 1%         | 5%         | 2%         | 16%        | 13%        | 14%        | 15%        | 7%         | 11%        |
| ≤ 70 mg/dL (%)                        | 4%           | 5%         | 12%        | 11%        | 11%        | 10%        | 16%        | 14%        | 17%        | 16%        | 2%         | 3%         |
| ≤ 60 mg/dL (%)                        | 2%           | 2%         | 4%         | 5%         | 4%         | 5%         | 10%        | 7%         | 11%        | 6%         | 0%         | 1%         |
| Mean glucose (mg/dL)                  | 161          | 170        | 127        | 132        | 141        | 130        | 162        | 158        | 151        | 151        | 160        | 168        |
| Glucose CV (%)                        | 41%          | 48%        | 36%        | 38%        | 41%        | 40%        | 51%        | 49%        | 54%        | 59%        | 37%        | 38%        |
| Limited to paired values ( <i>n</i> ) | 1,462        | 1,462      | 814        | 814        | 730        | 730        | 911        | 911        | 542        | 542        | 747        | 747        |
| 71–180 mg/dL (%)                      | 61%          | 59%        | 73%        | 71%        | 66%        | 72%        | 46%        | 50%        | 51%        | 50%        | 63%        | 59%        |
| > 180 mg/dL (%)                       | 36%          | 37%        | 15%        | 18%        | 23%        | 18%        | 38%        | 36%        | 32%        | 32%        | 36%        | 37%        |
| > 250 mg/dL (%)                       | 12%          | 16%        | 0%         | 1%         | 5%         | 2%         | 16%        | 13%        | 12%        | 14%        | 7%         | 11%        |
| ≤ 70 mg/dL (%)                        | 4%           | 5%         | 11%        | 11%        | 11%        | 10%        | 16%        | 14%        | 16%        | 18%        | 2%         | 3%         |
| ≤ 60 mg/dL (%)                        | 2%           | 2%         | 4%         | 5%         | 4%         | 5%         | 10%        | 7%         | 10%        | 8%         | 0%         | 1%         |
| Mean glucose (mg/dL)                  | 164          | 170        | 127        | 133        | 141        | 130        | 161        | 159        | 149        | 147        | 162        | 167        |
| Glucose CV (%)                        | 42%          | 48%        | 36%        | 39%        | 41%        | 40%        | 51%        | 49%        | 53%        | 60%        | 36%        | 38%        |

CV, coefficient of variation (SD/mean); Ref, reference.
