# Supplementary material
Source: PubMed Central journal article supplement (PMC3459006)
Supplement: Supp_Table6.pdf [file Supp_Table6.pdf]

SUPPLEMENTARY TABLE S6. SIMPLE LINEAR REGRESSION PARAMETER ESTIMATES  
( $\pm$  95% CONFIDENCE INTERVAL) FOR EACH OUTCOME

| <i>Outcome</i>                                    | <i>Navigator (n=55)</i> |                 | <i>Guardian (n=24)</i> |                 |
|---------------------------------------------------|-------------------------|-----------------|------------------------|-----------------|
|                                                   | <i>Intercept</i>        | <i>Slope</i>    | <i>Intercept</i>       | <i>Slope</i>    |
| Mean glucose (mg/dL)                              | 24 $\pm$ 22             | 0.84 $\pm$ 0.14 | 5 $\pm$ 24             | 0.95 $\pm$ 0.14 |
| Percentage of values between 71 and 180 mg/dL (%) | 21 $\pm$ 9              | 0.67 $\pm$ 0.14 | 9 $\pm$ 10             | 0.83 $\pm$ 0.17 |
| Percentage of values $\leq$ 70 mg/dL (%)          | 3 $\pm$ 2               | 0.63 $\pm$ 0.12 | 2 $\pm$ 3              | 0.85 $\pm$ 0.20 |
| Nadir glucose (mg/dL)                             | 41 $\pm$ 9              | 0.34 $\pm$ 0.13 | 0 $\pm$ 20             | 0.94 $\pm$ 0.23 |
| Area under the curve 70 mg/Dl                     | 0.38 $\pm$ 0.21         | 0.40 $\pm$ 0.09 | 0.21 $\pm$ 0.47        | 0.73 $\pm$ 0.25 |
| Low Blood Glucose Index                           | 0.9 $\pm$ 0.4           | 0.52 $\pm$ 0.11 | 0.3 $\pm$ 0.5          | 0.85 $\pm$ 0.20 |
| Percentage of values > 180 mg/dL (%)              | 8 $\pm$ 5               | 0.69 $\pm$ 0.13 | -1 $\pm$ 7             | 1.01 $\pm$ 0.14 |
| Peak glucose (mg/dL)                              | -9 $\pm$ 40             | 1.11 $\pm$ 0.15 | 43 $\pm$ 62            | 0.83 $\pm$ 0.23 |
| Area under the curve 180 mg/dL                    | 3.71 $\pm$ 4.12         | 0.91 $\pm$ 0.17 | 0.04 $\pm$ 5.78        | 0.88 $\pm$ 0.18 |
| High Blood Glucose Index                          | 1.3 $\pm$ 1.3           | 0.87 $\pm$ 0.16 | 0.3 $\pm$ 1.7          | 0.91 $\pm$ 0.16 |
| Glucose CV (%)                                    | 3 $\pm$ 7               | 1.05 $\pm$ 0.19 | 9 $\pm$ 6              | 0.71 $\pm$ 0.16 |

CV, coefficient of variation (SD/mean).
